# Supplementary material
Source: PubMed Central journal article supplement (PMC6685791)

## SUPPORTING INFORMATION

**New Member of Gromochytriales (Chytridiomycetes) – *Apiochytrium granulosporum* nov. gen. et sp.** by Sergey A. Karpov, David Moreira, Maria A. Mamkaeva, Olga V. Popova, Vladimir V. Aleoshin and Purificación López-García

**Fig. S1.** S943 intron Bayesian phylogenetic tree. Numbers at branches are Bayesian posterior probabilities (only values higher than 0.5 are shown). Branch colors indicate the taxonomy of the corresponding sequences. The arrow indicates the position of the *Apiochytrium* sequence.

Tree scale: 0.1

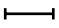

- Ascomycota
- Basidiomycota
- zoosporic fungi
- Amoebozoa
- Viridiplantae
- Ciliata

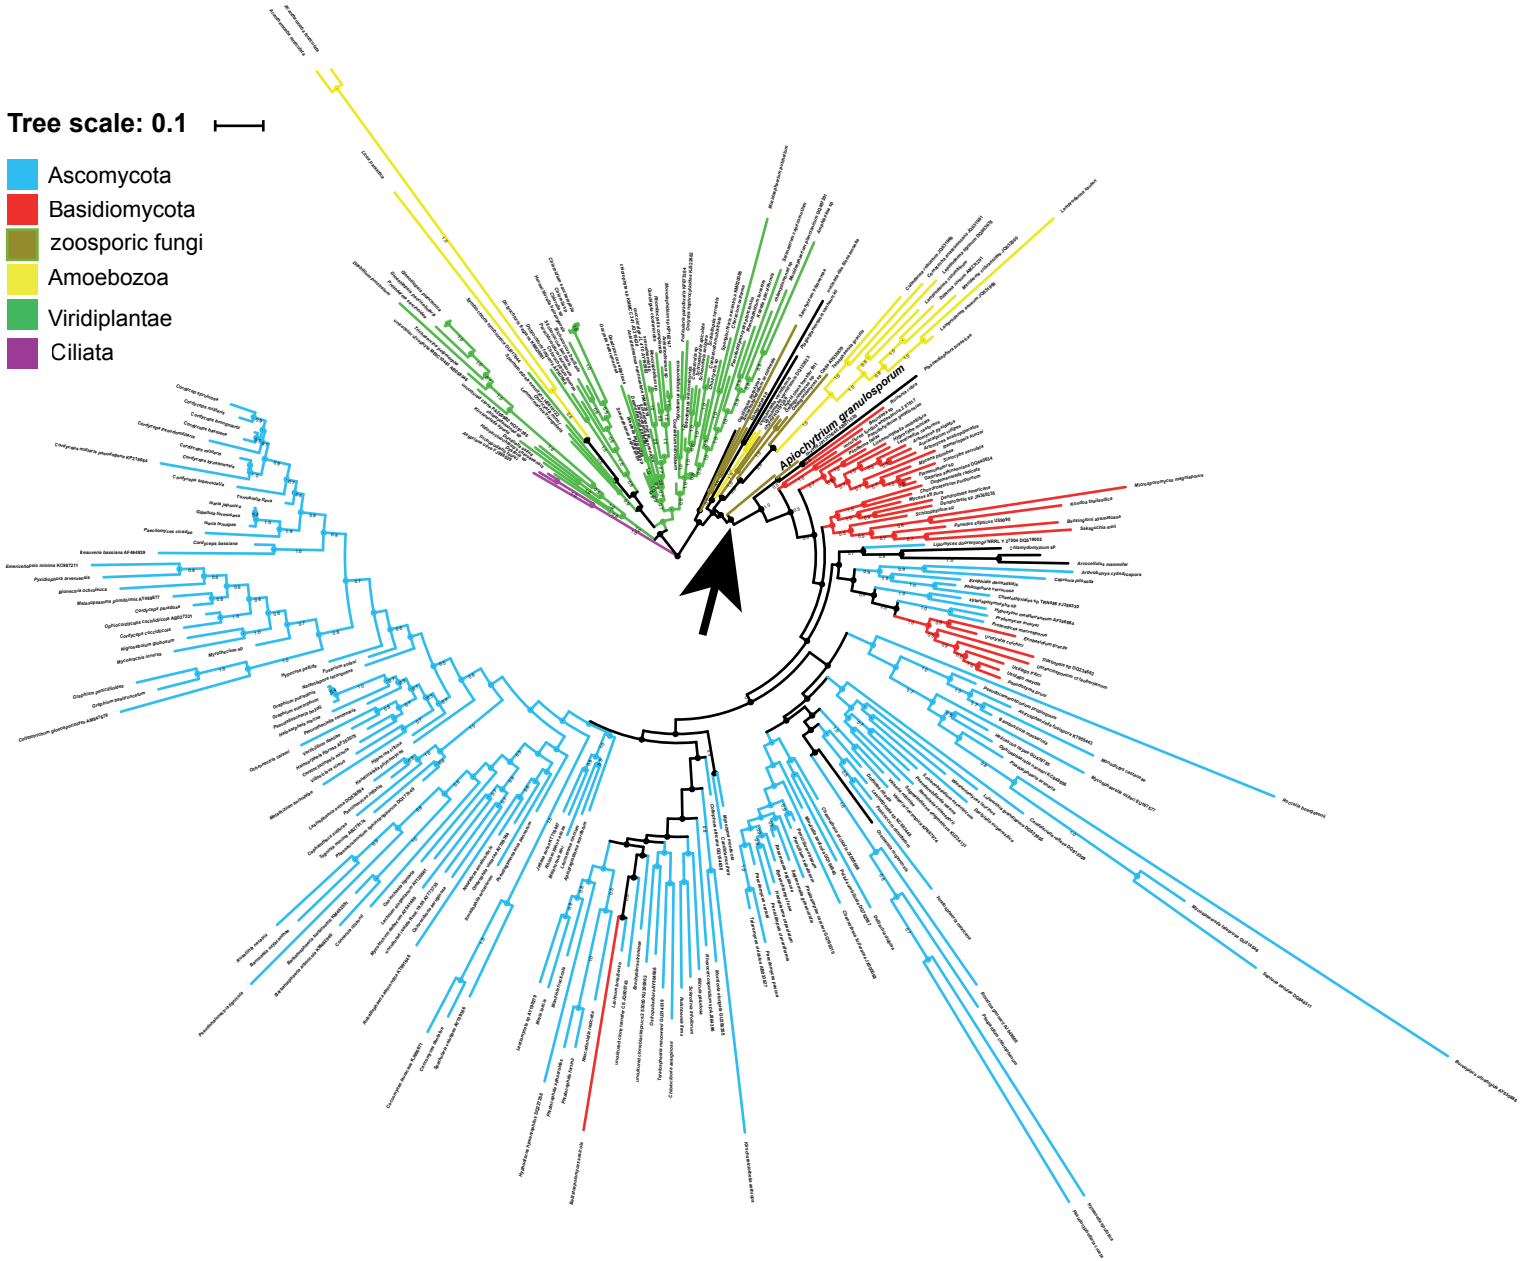

Supplement: EMS83914-supplement-Supplementary_Figure_S1.pdf [file EMS83914-supplement-Supplementary_Figure_S1.pdf]
